# Supplementary material
Source: Research Square preprint supplement (doi:10.21203/rs.3.rs-9488956/v1)
Supplement: Supplementary file 1 [file 048ce6e5317cb0a733944891.docx]

**Supplementary Material: Full Search Strategy and Database Queries.**

**IEEE Xplore :**

(("Full Text & Metadata":"machine learning") OR

("Full Text & Metadata":"artificial intelligence") OR

("Full Text & Metadata":"deep learning") OR

("Full Text & Metadata":"neural network") OR

("Full Text & Metadata":"recurrent neural network") OR

("Full Text & Metadata":"RNN") OR

("Full Text & Metadata":"long short-term memory") OR

("Full Text & Metadata":"LSTM") OR

("Full Text & Metadata":"gated recurrent unit") OR

("Full Text & Metadata":"GRU") OR

("Full Text & Metadata":"convolutional neural network") OR

("Full Text & Metadata":"CNN") OR

("Full Text & Metadata":"support vector machine") OR

("Full Text & Metadata":"SVM") OR

("Full Text & Metadata":"decision tree") OR

("Full Text & Metadata":"random forest") OR

("Full Text & Metadata":"gradient boosting") OR

("Full Text & Metadata":"ARIMAX") OR

("Full Text & Metadata":"ARIMA") OR

("Full Text & Metadata":"SARIMAX") OR

("Full Text & Metadata":"XGBoost") OR

("Full Text & Metadata":"k-means") OR

("Full Text & Metadata":"unsupervised learning") OR

("Full Text & Metadata":"supervised learning") OR

("Full Text & Metadata":"classification") OR

("Full Text & Metadata":"bayesian network") OR

("Full Text & Metadata":"ensemble learning") OR

("Full Text & Metadata":"transfer learning") OR

("Full Text & Metadata":"online learning") OR

("Full Text & Metadata":"federated learning"))

AND

(("Full Text & Metadata":"type 1 diabetes") OR

("Full Text & Metadata":"type I diabetes") OR

("Full Text & Metadata":"T1DM") OR

("Full Text & Metadata":"T1D") OR

("Full Text & Metadata":"TID") OR

("Full Text & Metadata":"TIDM"))

AND

(("Full Text & Metadata":"exercise") OR ("Full Text & Metadata":"physical activity"))

**Engineering Village :**

((((("machine learning" OR

"artificial intelligence" OR

"deep learning" OR

"neural network" OR

"recurrent neural network" OR

"RNN" OR

"long short-term memory" OR

"LSTM" OR

"gated recurrent unit" OR

"GRU" OR

"convolutional neural network" OR

"CNN" OR

"support vector machine" OR

"SVM" OR

"decision tree" OR

"random forest" OR

"gradient boosting" OR

"ARIMAX" OR

"ARIMA" OR

"SARIMAX" OR

"XGBoost" OR

"k-means" OR

"unsupervised learning" OR

"supervised learning" OR

"classification" OR

"bayesian network" OR

"ensemble learning" OR

"transfer learning" OR

"online learning" OR

"federated learning")

AND

("type 1 diabetes" OR

"type I diabetes" OR

"T1DM" OR

"T1D" OR

"TID" OR

"TIDM")

AND

("exercise" OR "physical activity") WN ALL)) AND ({ja} WN DT))

**OVID-Medline :**

(

("machine learning" or

"artificial intelligence" or

"deep learning" or

"neural network" or

"recurrent neural network" or

"RNN" or

"long short-term memory" or

"LSTM" or

"gated recurrent unit" or

"GRU" or

"convolutional neural network" or

"CNN" or

"support vector machine" or

"SVM" or

"decision tree" or

"random forest" or

"gradient boosting" or

"ARIMAX" or

"ARIMA" or

"SARIMAX" or

"XGBoost" or

"k-means" or

"unsupervised learning" or

"supervised learning" or

"classification" or

"bayesian network" or

"ensemble learning" or

"transfer learning" or

"online learning" or

"federated learning").tw. or

(exp Neural Networks, Computer/ or exp Artificial Intelligence/ or exp Machine Learning/)

)

and

(

("type 1 diabetes" or

"type I diabetes" or

"T1DM" or

"T1D" or

"TID" or

"TIDM").tw. or

exp Diabetes Mellitus, Type 1/

)

and

(("exercise" or "physical activity").tw. or exp Exercise/)

limit 1 to (english language and yr="2010 - 2025")
